# Supplementary material for: Emodin Interferes With AKT1-Mediated DNA Damage and Decreases Resistance of Breast Cancer Cells to Doxorubicin
Source: PubMed Central journal article supplement (PMC7900193; doi:10.3389/fonc.2020.588533), 2021-02-09
Supplement: DataSheet_1.pdf [file DataSheet_1.pdf]

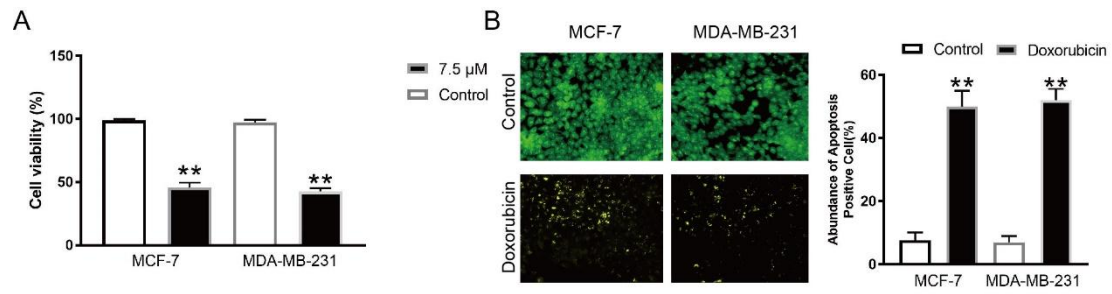

**Doxorubicin (7.5  $\mu$ M) inhibit cell viability and induce BC cell apoptosis.**

BC cells were treated with Doxorubicin (7.5  $\mu$ M) for 48 h. (A) CCK-8 assay and (B) AO/EB staining. \*\* $p < 0.01$  vs the control group. The analysis was conducted using the Student's t-test.
